# Supplementary material for: A Sesquiterpenoid from Farfarae Flos Induces Apoptosis of MDA-MB-231 Human Breast Cancer Cells through Inhibition of JAK–STAT3 Signaling
Source: MDPI journal article supplement (doi:10.3390/biom9070278), 2019-07-13
Supplement: s1 [file s1]

Article

# A Sesquiterpenoid from *Farfarae* Flos Induces Apoptosis of MDA-MB-231 Human Breast Cancer Cells through Inhibition of JAK–STAT3 Signaling

Hyeri Jang, Hyejin Ko, Kwangho Song and Yeong Shik Kim\*

Natural Products Research Institute, College of Pharmacy, Seoul National University, 1 Gwanak-ro, Gwanak-gu, Seoul 08826, Korea

\* Correspondence: kims@snu.ac.kr; Tel.: +82-2-880-2479

## Appendix A. Supplementary data

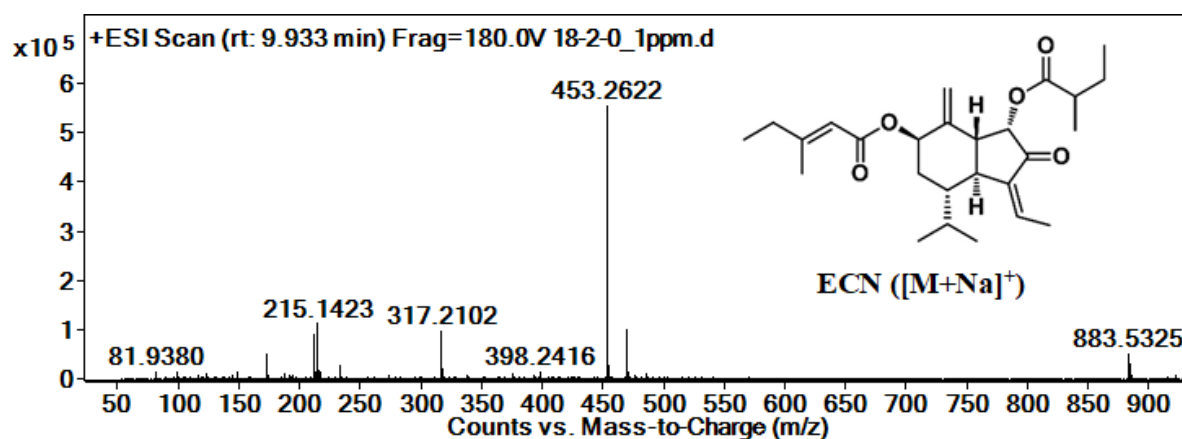

**Figure S1.** The representative MS spectrum of ECN at  $m/z$  453.2662  $[M+Na]^+$ .
